# Supplementary material for: Electrochemiluminescence resonance energy transfer between a Ru-ZnMOF self-enhanced luminophore and a double quencher ZnONF@PDA to detect NSE
Source: Royal Society of Chemistry journal article supplement (doi:10.1039/d3an01106b), 2023-01-01
Supplement: d3an01106b1.pdf [file d3an01106b1.pdf]

## Supplementary Material

### **Electrochemiluminescence resonance energy transfer between Ru-ZnMOF self-enhanced luminophore and a double quencher ZnONF@PDA to detect NSE**

Juan Yang, Dongmiao Qin, Na Wang, Yusheng Wu, Kanjun Fang, Biyang Deng\*

State Key Laboratory for Chemistry and Molecular Engineering of Medicinal  
Resources, School of Chemistry and Pharmaceutical Sciences, Guangxi Normal  
University, Guilin 541004, China

\*Corresponding author:

Email: [dengby16@163.com](mailto:dengby16@163.com)

## Table of Contents

|                 |    |
|-----------------|----|
| Figure S1.....  | S3 |
| Figure S2.....  | S4 |
| Figure S3.....  | S5 |
| Figure S4.....  | S6 |
| Table S1.....   | S7 |
| References..... | S8 |

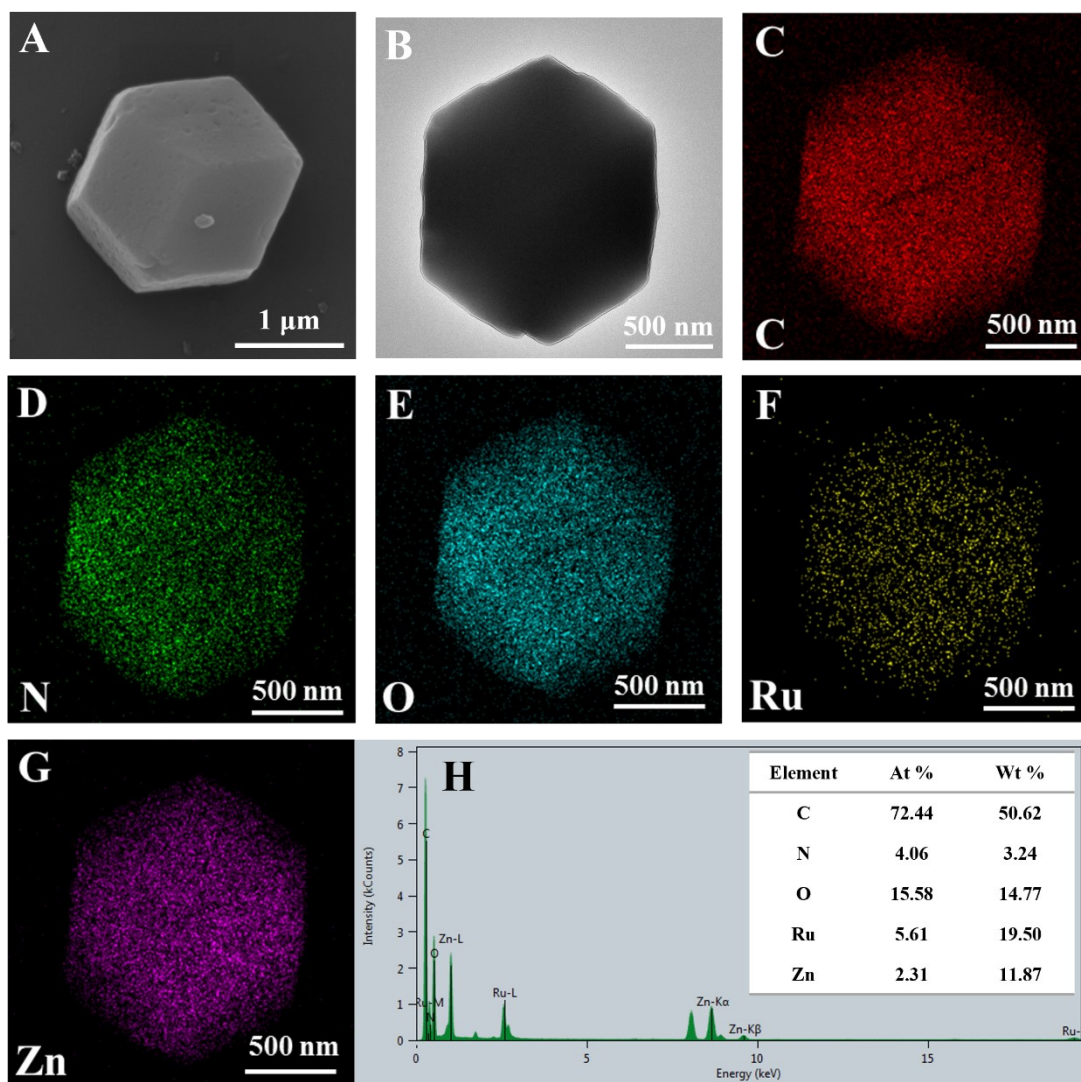

**Fig. S1.** (A) SEM image of Ru-ZnMOF, (B) TEM image of Ru-ZnMOF, (C-G) TEM element maps of C, N, O, Ru, and Zn of Ru-Ru-ZnMOF, and (H) EDS spectrum of Ru-ZnMOF

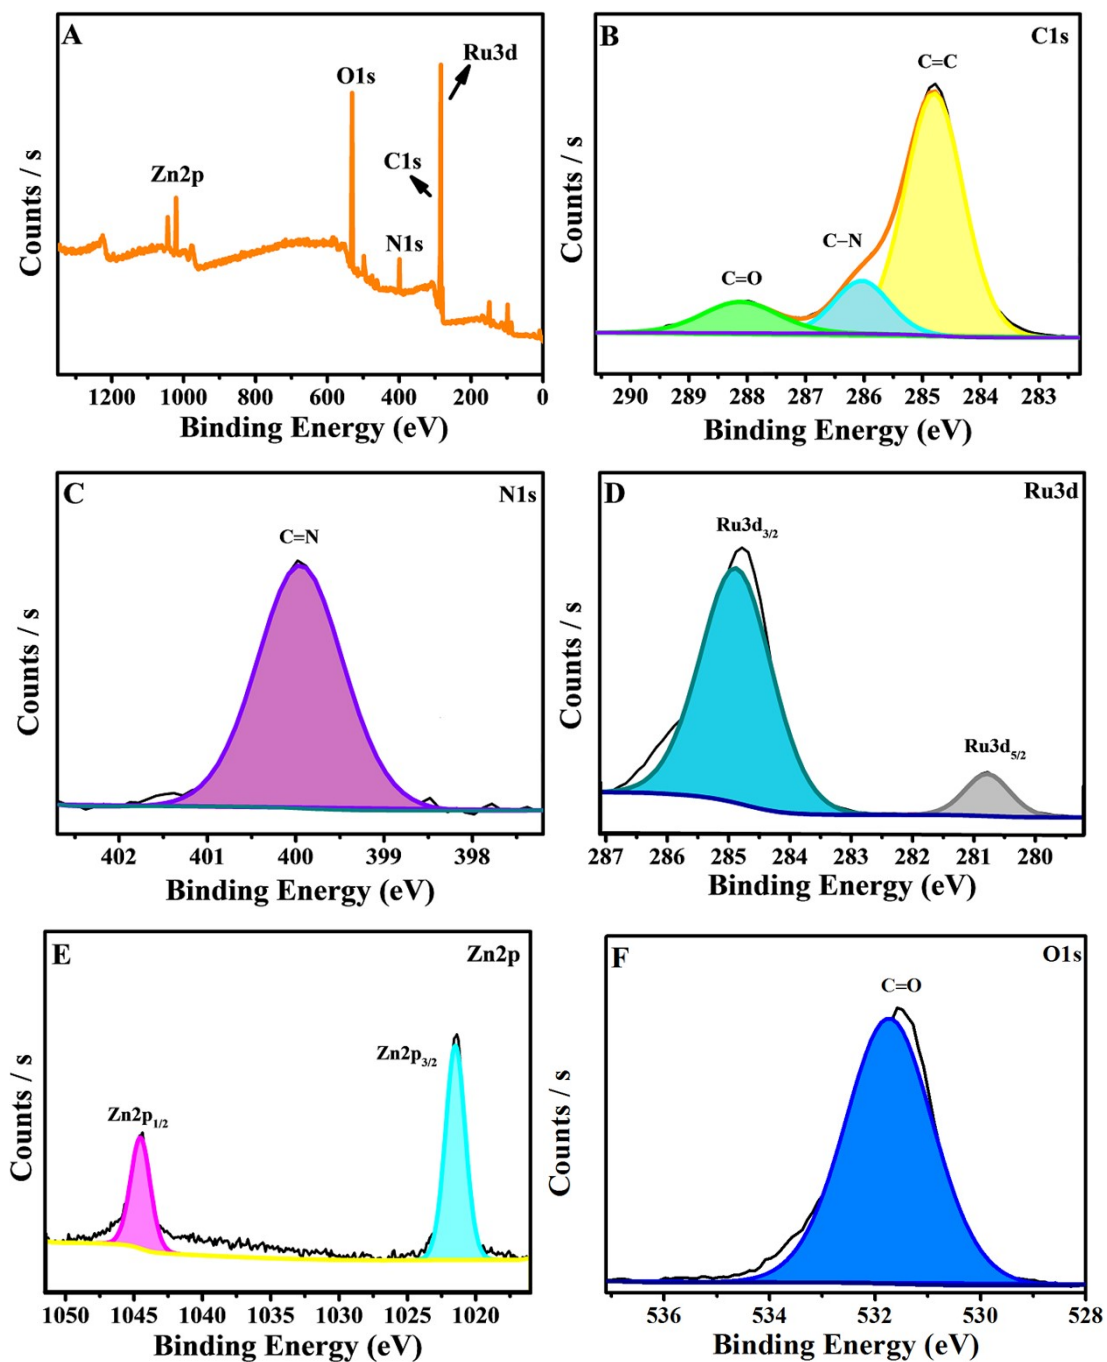

Fig. S2. (A) XPS survey spectrum of Ru-ZnMOF and (B) C 1s, (C) N 1s, (D) Ru 3d, (E) Zn 2p, and (F) O 1s spectra

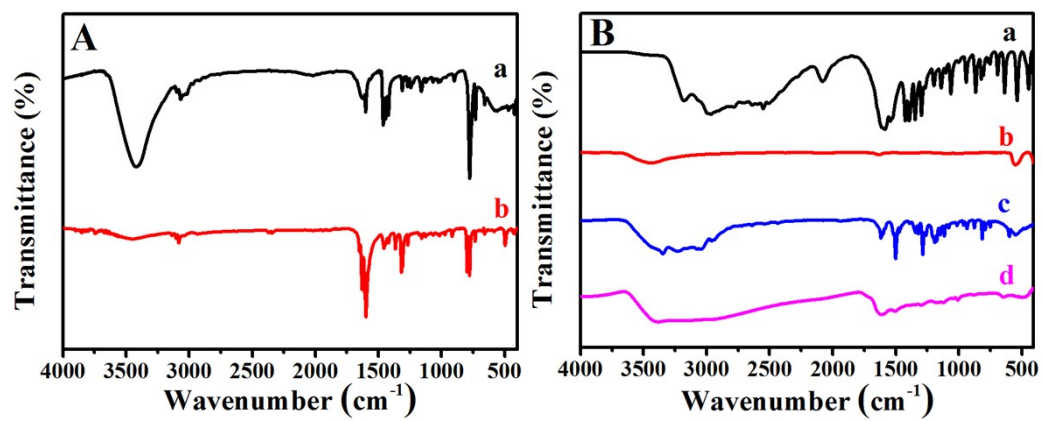

**Fig. S3.** FT-IR spectra: (A) Ru(bpy)<sub>3</sub><sup>2+</sup> (a) and Ru-ZnMOF (b). (B) L-cysteine (a), ZnONFs (b), PDA (c), and ZnONFs@PDA (d).

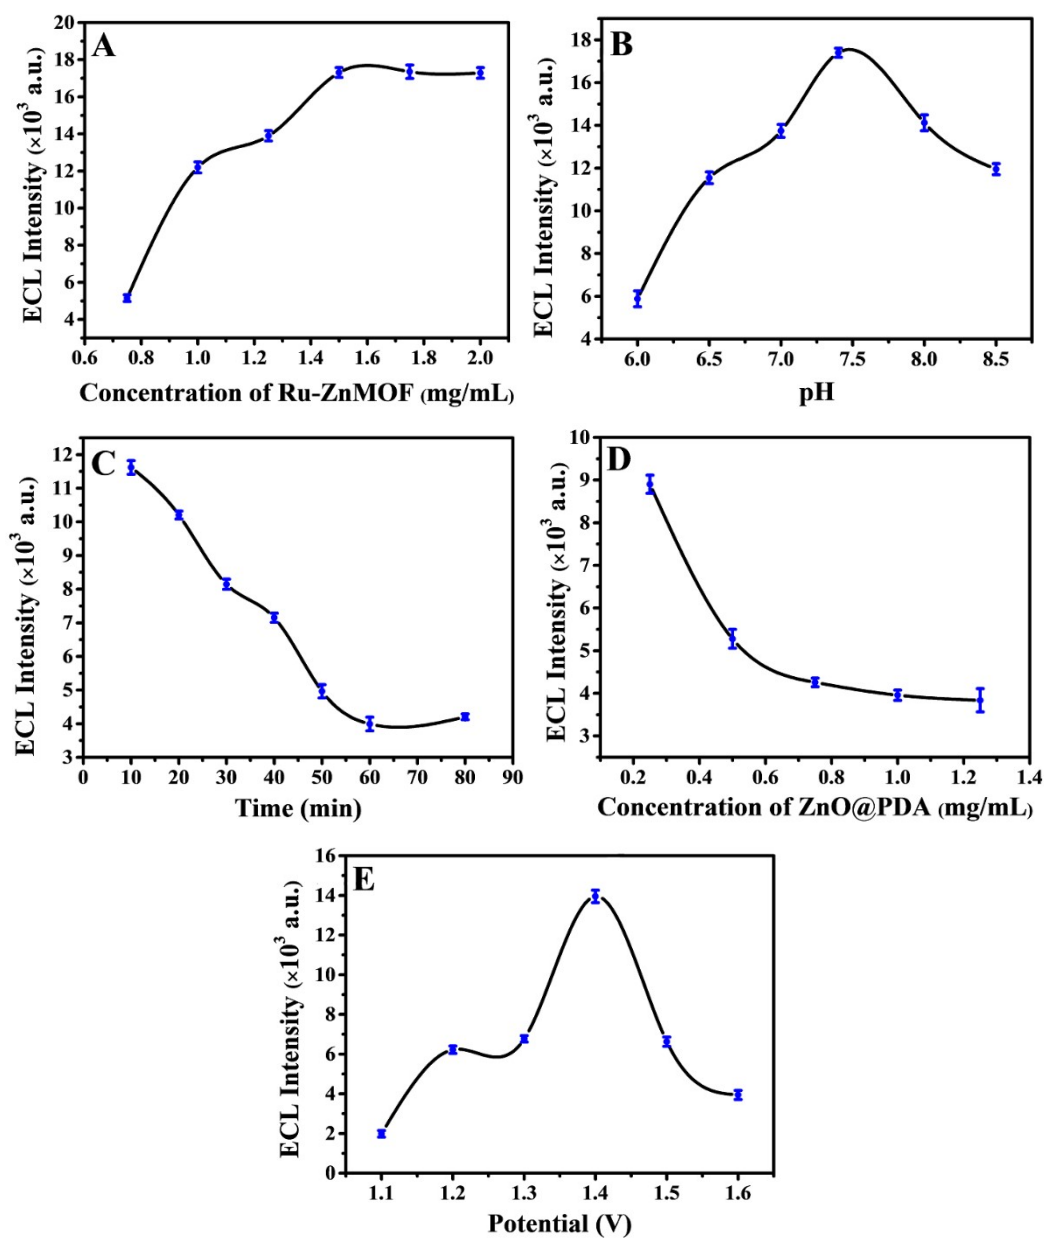

**Fig. S4.** (A) The concentration of Ru-ZnMOF luminophore, (B) the pH of buffer solution, (C) the incubation time of the sensor, (D) the concentration of quencher ZnONFs@PDA, (E) the potential scanning range of the sensor. (The concentration of NSE was 10 ng/mL,  $n = 3$ , error bar = SD.)

**Table S1** Comparison of NSE measured by different methods

| Method/Material                          | Detection range           | Detection limit       | Reference <sup>#</sup> |
|------------------------------------------|---------------------------|-----------------------|------------------------|
|                                          | (ng/mL)                   | (pg/mL)               |                        |
| Electrochemistry/WP6@PdPt PCONs          | $3 \times 10^{-3}$ –100   | $9.5 \times 10^{-2}$  | [1]                    |
| Resonance light scattering assay/AuNRs   | $4.8 \times 10^{-2}$ –150 | 15                    | [2]                    |
| Fluoroimmunoassay/PSM                    | 1.25–80.0                 | 625                   | [3]                    |
| Photoelectrochemistry/ZnCdHgSe QDs/PDPIT | $1.0 \times 10^{-3}$ –100 | 0.2                   | [4]                    |
| ECL/D-Fe <sub>2</sub> O <sub>3</sub> @Pt | $7.6 \times 10^{-5}$ –100 | $7.24 \times 10^{-2}$ | [5]                    |
| ECL/Ru-ZnMOF                             | $1 \times 10^{-5}$ –100   | $3.3 \times 10^{-3}$  | This work              |

## References

- [1] X. Zhou, X. Qian, X. Tan, X. Ran, Z. Li, Z. Huang, L. Yang and X. Xie, *Anal. Chim. Acta*, 2019, **1068**, 18–27.
- [2] Z. Chen, Y. Lei, H. Xu, X. Chen and J. Liu, *J Mater Chem B*, 2013, **1**, 3031–3034.
- [3] Z. Cao, H. Li, C. Lau and Y. Zhang, *Anal. Chim. Acta*, 2011, **698**, 44–50.
- [4] X. Yu, Y. Wang, X. Chen, K. Wu, D. Chen, M. Ma, Z. Huang, W. Wu and C. Li, *Anal. Chem.*, 2015, **87**, 4237–4244.
- [5] M. Li, J. Fang, C. Wang, J. Zhang, L. Liu, Y. Li, W. Cao and Q. Wei, *Biosens. Bioelectron.*, 2022, **214**, 114516.
